# Supplementary material for: The Microbial Rosetta Stone Database: A compilation of global and emerging infectious microorganisms and bioterrorist threat agents
Source: Springer Nature journal article supplement (doi:10.1186/1471-2180-5-19), 2005-04-25
Supplement: Additional file 8 [file 1471-2180-5-19-s8.pdf]

# Additional File 8. High Potential For Bioengineering

| Phylogeny                        | NCBI Name                           | Threat List Name or Synonym               | Accession                                      |                                                                                                                               |
|----------------------------------|-------------------------------------|-------------------------------------------|------------------------------------------------|-------------------------------------------------------------------------------------------------------------------------------|
| Bacteria                         | <a href="#">Alphaproteobacteria</a> | <i>Brucella melitensis</i>                | <i>Brucella</i> spp.<br>NC_003317<br>NC_003318 |                                                                                                                               |
|                                  |                                     | <i>Brucella melitensis</i> biovar Abortus | <i>Brucella</i> spp.<br>NC_004310<br>NC_004311 |                                                                                                                               |
|                                  |                                     | <i>Brucella melitensis</i> biovar Suis    | <i>Brucella</i> spp.<br>NZ_AADJ01000001        |                                                                                                                               |
|                                  |                                     | <i>Rickettsia rickettsii</i>              |                                                |                                                                                                                               |
|                                  | <a href="#">Betaproteobacteria</a>  | <i>Burkholderia mallei</i>                |                                                | NC_002970*                                                                                                                    |
|                                  |                                     | <i>Burkholderia pseudomallei</i>          |                                                | NC_002930*<br><a href="http://www.sanger.ac.uk/Projects/B_pseudomallei/">http://www.sanger.ac.uk/Projects/B_pseudomallei/</a> |
|                                  | <a href="#">Gammaproteobacteria</a> | <i>Coxiella burnetii</i>                  |                                                | NC_002971                                                                                                                     |
|                                  |                                     | <i>Escherichia coli</i>                   |                                                | NC_004431<br>NC_000913                                                                                                        |
|                                  |                                     | <i>Francisella tularensis</i>             |                                                |                                                                                                                               |
|                                  |                                     | <i>Vibrio cholerae</i>                    |                                                | NC_002505<br>NC_002506                                                                                                        |
|                                  |                                     | <i>Yersinia pseudotuberculosis</i>        |                                                |                                                                                                                               |
|                                  |                                     | <i>Yersinia pestis</i>                    |                                                | NC_003143<br>NC_004088                                                                                                        |
|                                  | <a href="#">Firmicutes</a>          | <i>Bacillus anthracis</i>                 |                                                | NC_003997<br>NC_003995*                                                                                                       |
|                                  |                                     | <i>Staphylococcus aureus</i>              |                                                | NC_002745<br>NC_002758<br>NC_003923                                                                                           |
|                                  | <a href="#">Spirochaetes</a>        | <i>Borrelia burgdorferi</i>               |                                                | NC_001318                                                                                                                     |
|                                  |                                     |                                           |                                                |                                                                                                                               |
|                                  | DNA Virus                           | <a href="#">Parvoviridae</a>              | Adeno-associated virus 1                       | NC_002077                                                                                                                     |
|                                  |                                     |                                           | Adeno-associated virus 2                       | NC_001401                                                                                                                     |
|                                  |                                     |                                           | Adeno-associated virus 2H                      |                                                                                                                               |
| Adeno-associated virus 3         |                                     |                                           | NC_001729                                      |                                                                                                                               |
| Adeno-associated virus 3B        |                                     |                                           | NC_001863                                      |                                                                                                                               |
| Adeno-associated virus 4         |                                     |                                           | NC_001829                                      |                                                                                                                               |
| Adeno-associated virus 5         |                                     |                                           |                                                |                                                                                                                               |
| Adeno-associated virus 6         |                                     |                                           | NC_001862                                      |                                                                                                                               |
| Adeno-associated virus 7         |                                     |                                           |                                                |                                                                                                                               |
| Adeno-associated virus 8         |                                     |                                           |                                                |                                                                                                                               |
| Adeno-associated virus 9         |                                     |                                           |                                                |                                                                                                                               |
| Adeno-associated virus 10        |                                     |                                           |                                                |                                                                                                                               |
| Adeno-associated virus 11        |                                     |                                           |                                                |                                                                                                                               |
| Adeno-associated virus 12        |                                     |                                           |                                                |                                                                                                                               |
| <a href="#">Poxviridae</a>       |                                     | Aracatuba virus                           |                                                |                                                                                                                               |
|                                  |                                     | BeAn 58058 virus                          |                                                |                                                                                                                               |
|                                  |                                     | Buffalopox virus                          |                                                |                                                                                                                               |
|                                  |                                     | Camelpox virus                            |                                                | NC_003391                                                                                                                     |
|                                  |                                     | Cantagalo orthopoxvirus                   |                                                |                                                                                                                               |
|                                  |                                     | Cowpox virus                              |                                                | NC_003663                                                                                                                     |
|                                  |                                     | Dolphin poxvirus 1                        |                                                |                                                                                                                               |
|                                  |                                     | Ectromelia virus                          |                                                | NC_004105                                                                                                                     |
|                                  |                                     | Elephantpox virus                         |                                                |                                                                                                                               |
|                                  |                                     | Monkeypox virus                           |                                                | NC_003310                                                                                                                     |
|                                  |                                     | Rabbitpox virus                           |                                                |                                                                                                                               |
|                                  |                                     | Skunkpox virus                            |                                                |                                                                                                                               |
|                                  |                                     | SPAN 232 virus                            |                                                |                                                                                                                               |
|                                  |                                     | Steller sea lion poxvirus                 |                                                |                                                                                                                               |
|                                  |                                     | Taterapox virus                           |                                                |                                                                                                                               |
|                                  |                                     | Vaccinia virus                            |                                                | NC_001559                                                                                                                     |
|                                  |                                     | Variola major virus                       |                                                | NC_001611                                                                                                                     |
|                                  |                                     | Variola minor virus                       |                                                |                                                                                                                               |
|                                  |                                     | Volepox virus                             |                                                |                                                                                                                               |
|                                  | - Strand RNA Virus                  | <a href="#">Arenaviridae</a>              | Junin virus                                    | NC_005080<br>NC_005081                                                                                                        |
|                                  |                                     |                                           | Lassa virus                                    | NC_004296<br>NC_004297                                                                                                        |
| <a href="#">Bunyviridae</a>      |                                     | California encephalitis virus             |                                                |                                                                                                                               |
|                                  |                                     | Sin Nombre virus                          | NC_005217<br>NC_005215<br>NC_005216            |                                                                                                                               |
| <a href="#">Filoviridae</a>      |                                     | Ivory Coast ebolavirus                    |                                                |                                                                                                                               |
|                                  |                                     | Lake Victoria marburgvirus                | NC_001608                                      |                                                                                                                               |
|                                  |                                     | Reston ebolavirus                         | NC_004161                                      |                                                                                                                               |
|                                  |                                     | Sudan ebolavirus                          |                                                |                                                                                                                               |
| Zaire ebolavirus                 |                                     | NC_002549                                 |                                                |                                                                                                                               |
| <a href="#">Orthomyxoviridae</a> |                                     | Influenza A virus                         | NC_004905<br>NC_004518<br>NC_002016            |                                                                                                                               |
|                                  |                                     | Influenza B virus                         | NC_004791<br>NC_004784<br>NC_002204            |                                                                                                                               |
|                                  |                                     | Influenza C virus                         |                                                |                                                                                                                               |
| + Strand RNA Virus               | <a href="#">Coronaviridae</a>       | SARS Coronavirus                          | NC_004718                                      |                                                                                                                               |
|                                  |                                     |                                           |                                                |                                                                                                                               |
|                                  | <a href="#">Flaviviridae</a>        | Dengue virus                              |                                                |                                                                                                                               |
|                                  |                                     | Dengue virus type 1                       |                                                |                                                                                                                               |
|                                  |                                     | Dengue virus type 2                       | NC_001474                                      |                                                                                                                               |
|                                  |                                     | Dengue virus type 3                       |                                                |                                                                                                                               |
|                                  |                                     | Dengue virus type 4                       |                                                |                                                                                                                               |
|                                  |                                     | Japanese encephalitis virus               | NC_001437                                      |                                                                                                                               |
|                                  |                                     | Tick-borne encephalitis virus             | NC_001672                                      |                                                                                                                               |
|                                  |                                     | West Nile virus                           | NC_001563                                      |                                                                                                                               |
|                                  |                                     | Yellow fever virus                        | NC_002031                                      |                                                                                                                               |
|                                  |                                     | <a href="#">Togaviridae</a>               | Eastern equine encephalitis virus              | NC_003899                                                                                                                     |
|                                  |                                     |                                           | Venezuelan equine encephalitis virus           | NC_001449                                                                                                                     |
|                                  |                                     |                                           | Western equine encephalomyelitis virus         | NC_003908                                                                                                                     |
|                                  |                                     |                                           |                                                |                                                                                                                               |
